# Supplementary material
Source: publisher figshare collection journal article supplement (https://frontiersin.figshare.com/ndownloader/files/30623979)
Supplement: Supplementary file 1 [file 30623979]

**Supplemental Table 03:** The whole genome sequencing output from the Ion Torrent S5 sequencing platform using Ion 530 Chip.

| Code | Bases | ≥ Q20 | Read Count | Mean Read Length |
| --- | --- | --- | --- | --- |
| IND_A | 1441998594 | 1285446984 | 45,30,595 | 318 |
| IND_B | 1396422949 | 1180666402 | 42,64,268 | 327 |
| ETP_INLET | 951596289 | 899504893 | 36,70,759 | 259 |
| ETP_OUTLET | 802465381 | 750861692 | 29,04,952 | 276 |
| CETP_PS_INLET | 652290068 | 615591448 | 25,47,357 | 256 |
| CETP_PS_OUTLET | 1069416025 | 907660638 | 33,96,465 | 314 |
| CETP_SS_INLET | 873862353 | 814387631 | 31,23,464 | 279 |
| CETP_SS_OUTLET | 1426283580 | 1280072239 | 42,94,066 | 332 |
| CETP_FINAL_DISCHARGE | 1223568130 | 1146107884 | 43,42,084 | 281 |
